# Supplementary material for: Changing Carboniferous Arc Magmatism in the Ossa-Morena Zone (Southwest Iberia): Implications for the Variscan Belt
Source: MDPI journal article supplement (doi:10.3390/min12050597), 2022-05-08
Supplement: s1 [file s1]

Archive with 4 entries (4 files):
- S4-text-Analytical methods- supplementary material-19-4-2022.pdf
- Table S1- WR geochemistry_Pereira et al_20-4-2022.xlsx
- Table S2 Sm-Nd_ Pereira et al_ 20-4-2022.xlsx
- Table S3- U-Pb geocronology_Pereira et al_25-3-2022.xlsx
