# Supplementary material for: Changing Carboniferous Arc Magmatism in the Ossa-Morena Zone (Southwest Iberia): Implications for the Variscan Belt
Source: MDPI journal article supplement (doi:10.3390/min12050597), 2022-05-08
Supplement: s1 [file s1 › Table S1- WR geochemistry_Pereira et al_20-4-2022.xlsx]

## Sheet: Results 
Table S1- whole-rock geochemistry (major and trace elements): Toca da Moura (TM) rhyolites and trachyandesite; Baleizão (BL) porphyries; Alcáçovas (ALC) quartzdioritic rock (group ages according to [16])
	Sample	Rock type	SiO2	TiO2	Al2O3	CaO	Fe2O3(t)	K2O	MgO	MnO	Na2O	P2O5	LOI (1050)	Ba	Co	Cr	Cs	Cu	Hf	Nb	Ni	Pb	Rb	Sc	Sn	Sr	Ta	Th	U	V	Y	Zn	Ga	Zr	La	Ce	Pr	Nd	Sm	Eu	Gd	Tb	Dy	Ho	Er	Tm	Yb	Lu
			wt. %	wt. %	wt. %	wt. %	wt. %	wt. %	wt. %	wt. %	wt. %	wt. %	wt. %	ppm	ppm	ppm	ppm	ppm	ppm	ppm	ppm	ppm	ppm	ppm	ppm	ppm	ppm	ppm	ppm	ppm	ppm	ppm	ppm	ppm	ppm	ppm	ppm	ppm	ppm	ppm	ppm	ppm	ppm	ppm	ppm	ppm	ppm	ppm
Group 1 (335 Ma)	SCV-15-18	TM rhyolite	71.5759	0.20014	12.5354	1.59833	2.50742	3.70966	1.89322	0.215844	0.0771072	0.0999479	5.2462	567.616	2.48299	4.72519	1.98221	11.8025	8.0946	13.3415	<LMD	71.7154	158.332	9.09268	7.0494	14.6362	1.42314	23.1723	10.5148	4.69378	66.6727	111.028	20.7818	284.07	47.7754	94.8703	11.6943	43.3608	9.14154	1.1984	8.54478	1.50934	8.87108	1.53202	4.78626	0.907174	5.25041	0.915899
Group 1 (335 Ma)	SCV-16-18	TM rhyolite	75.0417	0.603898	11.0376	0.281018	4.54064	2.00443	1.08822	0.082233	1.38374	0.171864	3.7515	328.89	16.6891	57.1776	3.28683	15.1845	3.72618	11.8583	27.8946	23.5011	95.5378	12.5712	1.79512	63.3741	0.931131	9.20562	2.52212	99.6619	27.2936	70.8762	15.9326	139.991	31.6249	64.058	7.85441	28.9515	5.53746	1.12469	4.72301	0.7442	4.08678	0.674153	2.03593	0.391477	2.02474	0.374276
Group 1 (335 Ma)	SCV-18-18	TM rhyolite	74.2657	0.197182	12.9034	0.456467	3.00195	1.44975	0.753713	0.0633562	4.45041	0.112559	2.33327	410.212	4.15556	14.7315	2.54862	<LMD	5.64824	9.907	<LMD	14.1897	64.7567	9.86093	4.59599	139.041	0.956976	17.7648	5.68694	14.7352	41.0949	67.0418	18.5941	185.941	20.4369	65.8624	6.25822	23.238	4.9019	0.758505	4.10396	0.806418	5.31469	0.968402	3.31708	0.641117	3.95285	0.673735
Group 1 (335 Ma)	SCV-1-18	TM trachyandesite	58.0746	0.85681	15.4946	4.95065	6.86134	2.89602	3.26102	0.240078	4.06814	0.163805	2.99389	519.57	17.736	71.9207	0.875489	<LMD	4.07842	6.79965	13.625	36.3802	64.5692	23.151	2.3648	140.363	0.578347	8.39845	3.2833	131.743	37.9738	112.653	19.1069	158.013	21.1118	44.6398	5.7115	23.0139	5.35849	1.12533	5.12201	0.913017	5.34821	0.919015	2.92686	0.540476	3.06909	0.524368
Group 2 (318 Ma)	SCV-12-18	BL porphyry	72.4269	0.291003	13.3886	1.37144	1.91884	4.94988	0.697759	0.0364664	3.73973	0.139511	0.869826	382.068	4.90536	20.6211	8.49129	<LMD	3.53736	18.4356	<LMD	52.251	280.884	8.27071	5.65412	136.476	3.79437	25.7005	4.73942	22.4627	21.8758	32.3584	22.9079	112.03	29.2217	58.3827	6.95735	25.1339	5.27569	0.561769	4.1647	0.65425	3.4807	0.499642	1.47889	0.247089	1.4793	0.24547
Group 2 (318 Ma)	SCV-2-18	BL porphyry	75.7575	0.19056	13.092	0.427282	2.9874	1.45111	0.774518	0.0643488	4.4267	0.114149	0.231928	360.447	3.88891	13.5101	2.84441	<LMD	5.07019	8.85651	8.12443	12.7672	58.0849	9.42073	4.23552	123.444	0.844773	15.6365	5.04221	12.8449	36.7597	57.2922	16.538	179.058	18.8384	61.7531	5.78829	21.1698	4.43758	0.664161	3.88269	0.719028	4.62876	0.848969	3.01693	0.571679	3.45214	0.600745
Group 2 (318 Ma)	SCV-5-18	BL porphyry	72.4918	0.35112	12.5218	1.2907	3.95499	0.267055	0.548967	0.0422478	4.03319	0.13079	4.16376	108.21	12.5199	9.08885	1.93253	<LMD	7.25505	10.8034	75.1506	6.02144	9.10253	12.3674	4.39291	57.0668	0.954437	17.1728	5.21011	52.7658	43.2058	31.8276	18.033	272.724	31.4366	69.5593	8.86989	33.1179	6.70373	0.881906	5.55223	1.02462	6.10941	1.10791	3.75558	0.703218	4.09966	0.69442
Group 2 (318 Ma)	SCV-7-18	BL porphyry	78.288	0.0950089	11.3774	0.197787	1.13797	0.0760616	0.293296	0.0241952	7.26538	0.108731	0.738081	87.6481	0.594089	8.16504	0.25263	<LMD	9.67355	17.0003	<LMD	2.74894	1.97106	5.93181	4.88675	25.2857	1.51442	26.4216	11.8386	1.7466	147.057	13.647	22.2074	278.075	67.0878	126.497	17.834	72.2676	17.0684	0.961902	18.0635	3.38733	20.6625	3.32826	9.99842	1.72547	9.65083	1.57894
Group 2 (318 Ma)	SCV-8-18	ALC quartzdioritic rock	55.9385	0.959751	14.671	5.51862	7.79001	1.58726	4.87502	0.13388	4.33173	0.167356	3.90531	647.565	29.3797	65.7178	2.04216	<LMD	3.43738	6.89984	24.4901	5.34936	62.2072	26.7886	1.32125	355.44	0.516966	6.28968	2.63916	183.592	32.6604	46.3054	17.1159	131.624	17.1974	36.2127	4.85204	19.9598	4.63054	1.21802	4.56368	0.783598	4.6995	0.765836	2.36333	0.414367	2.64752	0.437143
	LMD (ppb)		774.283	0.904946	11.3326	188.484	18.4932	111.641	2.15466	0.0736471	15.2324	64.3667		5.49269	1.39921	2.91786	0.0984206	56.9929	0.0232309	0.111855	44.6354	0.200114	1.16157	3.48186	0.32099	1.29503	0.346726	0.00722496	0.00630584	1.16587	0.217557	5.93904	4.66027	0.287992	0.139132	0.0727619	0.010337	0.0916235	0.0210894	0.00644699	0.0202583	0.00498726	0.0339242	0.00385887	0.0137775	0.00433799	0.0136462	0.00338446
	BCR-2 mean (n=4)		94.2891	99.7779	98.7691	101.203	98.3461	101.778	96.8906	101.018	103.953	83.6177		102.332	105.642	106.83	97.4834	92.6081	86.9129	99.003	85.241	97.3876	104.439	94.6594	94.7219	107.374	113.124	110.001	103.565	105.384	102.181	105.107	101.929	90.4542	103.493	102.518	107.101	109.453	105.864	100.83	94.7463	100.235	96.5868	96.1682	94.9889	101.195	93.6043	108.156
	ERROR		0.0310412	0.0465196	0.0456027	0.0449249	0.0449193	0.0600046	0.0453833	0.0428844	0.0436026	0.0375554		0.0515544	0.0532776	0.0460481	0.149607	0.337017	0.0337017	0.0601008	0.409698	0.0411519	0.0543338	0.0490204	0.105146	0.051998	0.0325853	0.0223365	0.0329342	0.0502618	0.0504473	0.0459304	0.0460915	0.0493392	0.0489427	0.0494624	0.0457861	0.0417052	0.0601971	0.0584077	0.0287956	0.038662	0.039688	0.0491044	0.0413949	0.0339356	0.029695	0.0285974
