# Supplementary material for: Changing Carboniferous Arc Magmatism in the Ossa-Morena Zone (Southwest Iberia): Implications for the Variscan Belt
Source: MDPI journal article supplement (doi:10.3390/min12050597), 2022-05-08
Supplement: s1 [file s1 › Table S2 Sm-Nd_ Pereira et al_ 20-4-2022.xlsx]

## Sheet: Sm-Nd isotopes
Table S2- Sm-Nd isotope data: Toca da Moura (TM) rhyolites and trachyandesite; Baleizão (BL) porphyries; Alcáçovas (ALC) quartzdioritic rock (group ages according to [16])
	Rock type	Sample	Age (Ma)	Sm	Nd	147Sm/144Nd	143Nd/144Nd	±StErr*10-6	ƐNd(0)	ƐNd(T)	TDM (Ma)
Group 1	rhyolite TM	SCV-15-18	335	6.01575	27.8905	0.130395	0.512519	1.40237	-2.32809	0.50918	965.103
Group 1	rhyolite TM	SCV-16-18	335	3.79521	19.219	0.119382	0.512566	1.3974	-1.40728	1.90236	781.9
Group 1	rhyolite TM	SCV-18-18	335	3.48228	16.1033	0.130726	0.512381	1.30276	-5.01277	-2.19193	1215.75
Group 1	trachyandesite TM	SCV-1-18	335	4.59687	19.516	0.142398	0.512573	1.23646	-1.25946	1.06471	1008.51
Group 2	Porphyry BL	SCV-12-18	318	3.9184	17.7529	0.133432	0.512436	1.37633	-3.93671	-1.3684	1153.14
Group 2	Porphyry BL	SCV-2-18	318	4.01711	18.6991	0.129872	0.512469	1.37322	-3.29608	-0.582562	1047.06
Group 2	Porphyry BL	SCV-5-18	318	5.70467	26.8846	0.128275	0.51241	1.38936	-4.44111	-1.66363	1130.35
Group 2	Porphyry BL	SCV-7-18	318	12.8714	52.4574	0.148343	0.512725	2.0353	1.69438	3.66116	757.76
Group 2	Qz-diorite ALC	SCV-8-18	318	3.91071	16.094	0.146904	0.512652	1.58923	0.263806	2.28792	902.229
Nd model ages (TDM) were calculated according to DePaolo [53].
Present-day CHUR parameters: 147Sm/144Nd = 0.1967; 143Nd/144Nd = 0.512638 [84].
Decay constant for 147Sm: 6.54x10-12 y-1 [83].
