# Supplementary material for: Changing Carboniferous Arc Magmatism in the Ossa-Morena Zone (Southwest Iberia): Implications for the Variscan Belt
Source: MDPI journal article supplement (doi:10.3390/min12050597), 2022-05-08
Supplement: s1 [file s1 › Table S3- U-Pb geocronology_Pereira et al_25-3-2022.xlsx]

## Sheet: PlotDat14
Source sheet	entregar - entregar	19.8043	0.0517729	17	0.0539381	25.2889	0.0512035	20.1571	0.0520312	19.9244	0.124188	19.7183	0.0632366	19.5019	0.0674324	19.4059	0.0695821	20.6441	0.0552004	19.527	0.0806476	19.4179	0.0745709	20.5284	0.0582307	20.3974	0.0533576	19.5498	0.0667953	20.2315	0.060735	20.5207	0.0628011	20.8091	0.0719358	21.2506	0.0533221	22.9232	0.100827	21.0246	0.059577	20.8979	0.0926218	20.3117	0.0685911	20.433	0.0689764	23.1598	0.0487459
Plot name	Concordia0	19.5005	0.123436	17	0.0539381	24.2973	0.0514267	20.1428	0.0522554	19.9151	0.125127	19.707	0.0635214	19.4903	0.0679302	19.3972	0.0701809	20.6241	0.0554642	19.5169	0.0810231	19.4047	0.0751394	20.5111	0.0584883	20.3664	0.0537632	19.5267	0.0671807	20.2169	0.0609694	20.4995	0.0631986	20.7957	0.0727262	21.2312	0.0535944	22.9071	0.101385	20.9942	0.0601531	20.8809	0.093172	20.3006	0.0694581	20.4106	0.0694192	21.5126	0.0491995
Plot Type	1	19.4404	0.0629846	17.1913	0.0538428	23.3791	0.0516512	20.1011	0.0524406	19.8877	0.125991	19.6741	0.0637628	19.4563	0.0683649	19.3716	0.0707359	20.5657	0.0556762	19.4872	0.0813446	19.3662	0.0756331	20.4604	0.0586971	20.2758	0.0540893	19.4592	0.0674896	20.1741	0.0611598	20.4377	0.063527	20.7559	0.0734554	21.1747	0.053817	22.8594	0.101878	20.9052	0.0606328	20.8313	0.0936349	20.2679	0.0702658	20.3451	0.069783	20.0778	0.0496587
1st free col	49	19.2146	0.0671512	17.3869	0.0537477	22.5265	0.0518772	20.0353	0.0525717	19.8434	0.126745	19.6224	0.063941	19.4027	0.0687013	19.3302	0.0712227	20.4736	0.0558191	19.4405	0.0815858	19.3056	0.076012	20.3806	0.0588401	20.133	0.0543093	19.3528	0.0676972	20.1066	0.0612909	20.3402	0.0637595	20.6915	0.0740916	21.0857	0.0539719	22.7822	0.102284	20.765	0.0609774	20.7531	0.0939729	20.215	0.0709791	20.2419	0.0700381	18.8168	0.0501237
Sigma Level	1	19.0093	0.069178	17.5869	0.0536528	21.7328	0.0521045	19.9508	0.052638	19.7841	0.127353	19.5558	0.0640418	19.3339	0.068912	19.2747	0.0716203	20.3554	0.0558815	19.3804	0.0817273	19.2276	0.0762455	20.278	0.0589057	19.9496	0.0544056	19.2161	0.0677864	20.0199	0.0613519	20.2149	0.0638774	20.6053	0.074607	20.9713	0.0540465	22.6789	0.102586	20.5848	0.0611589	20.6527	0.0941587	20.1442	0.0715667	20.1092	0.070164	17.6997	0.0505946
Absolute Errs	TRUE	20.1502	0.0548242	17.7914	0.0535582	20.9919	0.0523333	19.8545	0.0526343	19.7124	0.127791	19.48	0.064057	19.2555	0.0689802	19.2076	0.071911	20.2205	0.0558582	19.3119	0.0817576	19.1387	0.0763146	20.161	0.0588887	19.7404	0.0543702	19.0602	0.0677502	19.9211	0.061338	20.0721	0.0638711	20.5012	0.074979	20.8409	0.0540348	22.554	0.10277	20.3794	0.0611626	20.5381	0.0941771	20.0585	0.0720029	19.958	0.0701504
Symbol Type	1	19.2762	0.0803548	18.0005	0.0534638	20.2989	0.0525635	19.7541	0.0525608	19.6314	0.128038	19.4009	0.0639852	19.1737	0.0689001	19.1319	0.0720824	20.08	0.0557511	19.2405	0.0816743	19.0461	0.0762138	20.0391	0.0587904	19.5224	0.0542061	18.8977	0.0675915	19.818	0.0612503	19.9232	0.0637411	20.3836	0.0751914	20.7049	0.0539377	22.413	0.102829	20.1653	0.0609882	20.4187	0.0940268	19.9618	0.0722687	19.8004	0.0699984
Inverse Plot	TRUE	19.0924	0.0742166	18.2145	0.0533696	19.6492	0.0527951	19.6577	0.0524235	19.5448	0.128084	19.325	0.0638324	19.0952	0.0686784	19.0508	0.0721268	19.9451	0.0555689	19.172	0.0814841	18.9572	0.0759512	19.9221	0.0586187	19.3132	0.0539265	18.7419	0.067323	19.7192	0.0610958	19.7804	0.063498	20.2576	0.0752349	20.5744	0.0537631	22.2619	0.102759	19.9598	0.0606499	20.3042	0.0937198	19.8583	0.0723525	19.6491	0.0697204
Color Plot	TRUE	20.1	0.0578853	18.4335	0.0532757	19.0389	0.0530281	19.5733	0.0522335	19.4561	0.127927	19.2585	0.0636109	19.0264	0.068333	18.9679	0.0720423	19.8268	0.0553264	19.112	0.0812024	18.8793	0.075548	19.8195	0.0583877	19.1298	0.0535541	18.6052	0.0669666	19.6325	0.0608872	19.6551	0.0631615	20.1289	0.0751075	20.46	0.0535251	22.1076	0.102565	19.7797	0.060175	20.2037	0.0932811	19.7525	0.0722506	19.5165	0.0693389
3D plot	FALSE	19.6314	0.0527809	18.6577	0.053182	18.4644	0.0532626	19.5075	0.0520061	19.3694	0.127573	19.2067	0.0633387	18.9728	0.0678918	18.8868	0.0718326	19.7348	0.0550432	19.0652	0.080852	18.8186	0.075037	19.7397	0.0581159	18.987	0.0531191	18.4988	0.0665511	19.565	0.0606412	19.5576	0.0627587	20.003	0.0748149	20.371	0.0532431	21.9566	0.102253	19.6395	0.059602	20.1255	0.0927462	19.6489	0.0719674	19.4133	0.0688847
Linear	FALSE	18.979	0.0662375	18.8873	0.0530885	17.9229	0.0534985	19.4658	0.0517599	19.2885	0.127039	19.1738	0.0630377	18.9388	0.0673906	18.811	0.0715069	19.6764	0.0547423	19.0356	0.0804614	18.7801	0.0744595	19.689	0.0578254	18.8964	0.0526566	18.4313	0.0661103	19.5222	0.0603779	19.4958	0.0623224	19.8853	0.0743699	20.3145	0.0529398	21.8155	0.101839	19.5505	0.0589773	20.0759	0.0921583	19.5522	0.0715154	19.3478	0.0683947
Data Range	N8:R29	19.8695	0.0604267	19.1225	0.0529952	17.4114	0.053736	19.4515	0.0515147	19.2168	0.126348	19.1626	0.0627325	18.9272	0.06687	18.744	0.0710794	19.6564	0.0544479	19.0254	0.0800621	18.7669	0.0738623	19.6716	0.0575398	18.8654	0.0522043	18.4082	0.0656797	19.5076	0.0601185	19.4746	0.0618879	19.7812	0.0737919	20.2952	0.0526398	21.6906	0.10134	19.52	0.0583517	20.0589	0.0915653	19.4666	0.0709143	19.3254	0.0679086
Filled Symbols	FALSE	19.9976	0.0623445	19.3634	0.0529022	IsoLine	IsoLine	19.4658	0.0512905	19.1575	0.125529	19.1738	0.0624477	18.9388	0.0663722	18.6885	0.0705689	19.6764	0.0541841	19.0356	0.0796865	18.7801	0.0732939	19.689	0.0572822	18.8964	0.0517986	18.4313	0.0652943	19.5222	0.0598841	19.4958	0.0614904	19.695	0.0731061	20.3145	0.0523675	21.5873	0.100777	19.5505	0.0577756	20.0759	0.091015	19.3958	0.0701903	19.3478	0.0674658
ConcAge	FALSE	20.1933	0.0713267	19.6103	0.0528094			19.5075	0.0511053	19.1132	0.124618	19.2067	0.0622064	18.9728	0.0659375	18.647	0.0699975	19.7348	0.0539721	19.0652	0.0793651	18.8186	0.0728002	19.7397	0.0570734	18.987	0.0514726	18.4988	0.0649853	19.565	0.0596937	19.5576	0.0611621	19.6307	0.0723425	20.371	0.0521449	21.5101	0.100177	19.6395	0.0572959	20.1255	0.0905521	19.3429	0.0693751	19.4133	0.067102
ConcSwap	TRUE	20.7729	0.052981	19.8635	0.0527169			19.5733	0.0509742	19.0858	0.123656	19.2585	0.0620281	19.0264	0.0656011	18.6214	0.0693903	19.8268	0.0538292	19.112	0.0791238	18.8793	0.0724212	19.8195	0.0569304	19.1298	0.0512525	18.6052	0.0647778	19.6325	0.0595626	19.6551	0.0609296	19.5909	0.0715346	20.46	0.0519901	21.4624	0.0995634	19.7797	0.0569513	20.2037	0.0902141	19.3101	0.0685043	19.5165	0.0668469
1st Symbol-row	1	22.1848	0.0998959	20.1231	0.0526246			19.6577	0.0509078	19.0765	0.122685	19.325	0.0619273	19.0952	0.0653904	18.6127	0.0687739	19.9451	0.0537668	19.172	0.0789823	18.9572	0.0721877	19.9221	0.0568648	19.3132	0.0511563	18.7419	0.0646885	19.7192	0.0595016	19.7804	0.0608117	19.5774	0.0707176	20.5744	0.0519155	21.4463	0.0989648	19.9598	0.0567698	20.3042	0.0900283	19.2991	0.0676161	19.6491	0.066721
		20.2723	0.0589643	20.3894	0.0525325			19.7541	0.0509116	19.0858	0.121746	19.4009	0.0619121	19.1737	0.0653222	18.6214	0.068175	20.08	0.0537901	19.2405	0.078952	19.0461	0.0721186	20.0391	0.0568818	19.5224	0.0511917	18.8978	0.0647247	19.818	0.0595155	19.9232	0.060818	19.5909	0.0699271	20.7049	0.0519272	21.4624	0.0984069	20.1653	0.0567661	20.4187	0.0900099	19.3101	0.0667491	19.8004	0.0667346
		20.4784	0.0920935	20.6627	0.0524406			19.8545	0.0509851	19.1132	0.120881	19.48	0.0619839	19.2555	0.0654023	18.647	0.0676201	20.2205	0.0538972	19.3119	0.0790353	19.1387	0.0722194	20.161	0.0569801	19.7404	0.0513558	19.0602	0.0648835	19.9211	0.0596032	20.0721	0.0609479	19.6307	0.0691979	20.8409	0.0520243	21.5101	0.097914	20.3794	0.0569405	20.5381	0.0901602	19.3429	0.0659413	19.958	0.0668866
		19.8054	0.0681036	20.9432	0.0523489			19.9508	0.0511224	19.1575	0.120128	19.5558	0.0621367	19.3339	0.065624	18.6885	0.0671332	20.3554	0.0540794	19.3804	0.0792255	19.2276	0.0724821	20.278	0.0571518	19.9496	0.0516354	19.2161	0.065152	20.0199	0.0597577	20.2149	0.0611911	19.695	0.0685617	20.9713	0.0521989	21.5873	0.0975078	20.5849	0.0572788	20.6527	0.0904672	19.3958	0.0652281	20.1093	0.0671646
		19.8792	0.0684425	21.2313	0.0522575			20.0353	0.0513124	19.2168	0.119519	19.6224	0.0623582	19.4027	0.0659694	18.744	0.0667357	20.4736	0.0543219	19.4405	0.0795072	19.3056	0.0728852	20.3806	0.0573829	20.133	0.0520078	19.3528	0.0655084	20.1066	0.0599663	20.3402	0.0615276	19.7812	0.0680463	21.0857	0.0524369	21.6906	0.0972059	20.765	0.0577537	20.7531	0.0909059	19.4666	0.0646405	20.2419	0.0675461
		IsoLine	IsoLine	21.5272	0.0521663			20.1011	0.0515398	19.2885	0.119082	19.6741	0.0626304	19.4563	0.0664106	18.811	0.0664449	20.5657	0.0546051	19.4872	0.0798576	19.3662	0.0733963	20.4604	0.0576546	20.2758	0.0524428	19.4592	0.0659238	20.1741	0.0602123	20.4377	0.0619303	19.8854	0.0676743	21.1747	0.0527189	21.8155	0.0970216	20.9052	0.0583267	20.8313	0.0914409	19.5522	0.0642043	20.3451	0.0680003
				21.8313	0.0520753			20.1428	0.051786	19.3695	0.118835	19.707	0.0629314	19.4903	0.0669118	18.8868	0.0662736	20.6241	0.0549061	19.5169	0.0802483	19.4047	0.0739737	20.5111	0.0579451	20.3664	0.0529052	19.5267	0.0663647	20.2169	0.0604756	20.4995	0.0623666	20.003	0.0674619	21.2312	0.0530222	21.9566	0.096963	20.9942	0.0589513	20.8809	0.0920287	19.6489	0.0639384	20.4106	0.0684903
				22.144	0.0519846			20.1571	0.0520312	19.4561	0.118789	19.7183	0.0632366	19.5019	0.0674324	18.9679	0.0662292	20.6441	0.0552004	19.527	0.0806476	19.4179	0.0745709	20.5284	0.0582307	20.3974	0.0533576	19.5498	0.0667953	20.2315	0.060735	20.5207	0.0628011	20.1289	0.0674185	21.2506	0.0533221	22.1076	0.0970325	21.0246	0.059577	20.8979	0.0926218	19.7525	0.0638547	20.433	0.0689764
				22.4655	0.0518941					19.5448	0.118946					19.0508	0.0663137																	20.2577	0.0675458			22.2619	0.0972271					19.8583	0.0639566
				22.7962	0.0518038					19.6315	0.119299					19.1319	0.0665233																	20.3836	0.0678384			22.413	0.0975384					19.9618	0.0642397
				23.1367	0.0517137					19.7124	0.119833					19.2076	0.066849																	20.5012	0.0682834			22.554	0.0979527					20.0585	0.0646918
				23.4872	0.0516238					19.7841	0.120525					19.2747	0.0672765																	20.6054	0.0688615			22.6789	0.098452					20.1442	0.0652929
				23.8483	0.0515342					19.8434	0.121344					19.3302	0.0677871																	20.6915	0.0695472			22.7822	0.0990143					20.215	0.0660169
				24.2205	0.0514447					19.8877	0.122254					19.3716	0.0683584																	20.7559	0.0703108			22.8594	0.0996152					20.2679	0.0668321
				24.6042	0.0513555					19.9151	0.123216					19.3972	0.0689656																	20.7957	0.0711187			22.9071	0.100228					20.3006	0.0677028
				25	0.0512666					19.9244	0.124188					19.4059	0.0695821																	20.8091	0.0719358			22.9232	0.100827					20.3117	0.0685911
				25	0.0512666
				IsoLine	IsoLine

## Sheet: PlotDat16
Source sheet	entregar - entregar	0.3	318.506	1	317.6	11.7512
Plot name	Average0	20.7	318.506	2	322.4	14.508
Plot Type	15			3	323.4	9.702
1st free col	8			4	327.1	10.4672
Sigma Level	2			5	330.5	14.542
Absolute Errs	FALSE			6	312.2	15.2978
Symbol Type	1			7	326	8.802
Inverse Plot	FALSE			8	329.1	11.8476
Color Plot	TRUE			9	313	13.459
3D plot	FALSE			10	320.3	25.9443
Linear	FALSE			11	331	21.184
Data Range	W8:X29			12	316.5	11.7105
Filled Symbols	FALSE			13	314.6	16.6738
ConcAge	FALSE			14	311.6	19.0076
ConcSwap	TRUE			15	303.1	13.6395
1st Symbol-row	1			16	284.2	17.3362
				17	310.4	22.9696
				18	307.3	12.292
				19	317.5	16.51
				20	316.4	18.0348
				IsoLine	IsoLine	IsoLine	IsoLine

## Sheet: PlotDat28
Source sheet	entregar - entregar	0.3	315.825	1	317.2	11.4192
Plot name	Average0	17.7	315.825	2	319.2	9.2568
Plot Type	15			3	321.9	10.3008
1st free col	8			4	324.1	14.5845
Sigma Level	2			5	310.8	15.2292
Absolute Errs	FALSE			6	317.3	8.5671
Symbol Type	1			7	321.2	11.242
Inverse Plot	FALSE			8	310.7	13.0494
Color Plot	TRUE			9	319.5	26.199
3D plot	FALSE			10	327.4	20.9536
Linear	FALSE			11	313.3	11.5921
Data Range	BO8:BP29			12	309.7	16.4141
Filled Symbols	FALSE			13	304.7	18.5867
ConcAge	FALSE			14	302.5	13.915
ConcSwap	FALSE			15	307.8	22.7772
1st Symbol-row	1			16	311.3	16.4989
				17	311.4	17.7498
				IsoLine	IsoLine	IsoLine	IsoLine

## Sheet: PlotDat8
Source sheet	entregar - entregar	0.36045	0.0504941	0.331201	0.0460135	0.344398	0.0476374	0.357726	0.0492638	0.371186	0.0508927	0.38478	0.0525242	0.398508	0.0541582	0.412373	0.0557947	0.33046	0.046	0.331119	0.046	0.329804	0.046	0.317529	0.0443921	0.3	0.0495503	0.367867	0.0510598	0.455449	0.0518281	0.495833	0.0523338	0.524265	0.0529742	0.384614	0.0504841	0.58598	0.0522024	0.552295	0.0527376	0.406067	0.050475	0.385631	0.052338	0.496014	0.0538114	0.427516	0.0509475
Plot name	Concordia0	0.446714	0.0514392	0.331176	0.0460308	0.344372	0.0476554	0.357698	0.0492824	0.371157	0.050912	0.38475	0.052544	0.398477	0.0541787	0.41234	0.0558158	0.33046	0.046	0.33351	0.0462953	0.33046	0.0460814	0.330569	0.0460135	0.65	0.0529874	0.367694	0.0511928	0.455252	0.0519493	0.495524	0.0524776	0.523956	0.0531393	0.38439	0.0506449	0.585731	0.0523183	0.551935	0.0528996	0.405858	0.0506203	0.385277	0.0526009	0.495673	0.0540197	0.427327	0.0510746
Plot Type	1	0.481864	0.0520439	0.331101	0.0460468	0.344294	0.0476719	0.357617	0.0492995	0.371072	0.0509296	0.384661	0.0525623	0.398385	0.0541975	0.412244	0.0558353	0.33351	0.0463774	0.336568	0.0466722	0.33351	0.0464595	0.343738	0.0476374			0.367204	0.0512953	0.454682	0.0520482	0.494619	0.0526025	0.523041	0.0532899	0.383763	0.0507611	0.585003	0.0524149	0.550877	0.0530386	0.405264	0.0507276	0.384286	0.0527912	0.4947	0.0541698	0.426787	0.051169
1st free col	59	0.501767	0.0526058	0.330983	0.04606	0.34417	0.0476856	0.357488	0.0493137	0.370938	0.0509443	0.384522	0.0525775	0.398239	0.0542132	0.412093	0.0558514	0.336568	0.0467549	0.339633	0.0470491	0.336568	0.0468377	0.357037	0.0492638			0.366419	0.0513628	0.453764	0.0521205	0.493156	0.052703	0.521546	0.0534218	0.382758	0.0508278	0.583828	0.052488	0.549167	0.0531488	0.404313	0.0507922	0.382702	0.0529005	0.493137	0.0542552	0.42592	0.0512267
Sigma Level	1	0.37514	0.0496272	0.330832	0.0460695	0.344012	0.0476954	0.357323	0.0493239	0.370766	0.0509548	0.384342	0.0525884	0.398053	0.0542244	0.411899	0.055863	0.339633	0.0471326	0.342704	0.0474263	0.339633	0.0472161	0.370468	0.0508927			0.365373	0.0513923	0.452538	0.0521631	0.4912	0.0527746	0.519511	0.0535315	0.381421	0.050842	0.582257	0.0525345	0.546881	0.0532252	0.403046	0.0508113	0.380593	0.0529241	0.491052	0.0542723	0.424765	0.0512451
Absolute Errs	TRUE	0.574766	0.0518774	0.330659	0.0460745	0.343832	0.0477006	0.357135	0.0493292	0.37057	0.0509603	0.384138	0.052594	0.39784	0.0542302	0.411678	0.055869	0.342704	0.0475104	0.345783	0.0478035	0.342704	0.0475945	0.384031	0.0525242			0.364112	0.0513826	0.451057	0.0521739	0.488835	0.0528144	0.516992	0.0536159	0.379809	0.0508031	0.580358	0.0525522	0.544118	0.0532646	0.401517	0.0507841	0.378053	0.0528609	0.488537	0.0542201	0.423372	0.0512235
Symbol Type	1	0.535972	0.0523769	0.330479	0.0460745	0.343644	0.0477006	0.356939	0.0493292	0.370365	0.0509603	0.383925	0.052594	0.397618	0.0542302	0.411448	0.055869	0.345783	0.0478884	0.348868	0.0481809	0.345783	0.0479732	0.397729	0.0541582			0.362691	0.051334	0.449387	0.0521527	0.486166	0.0528204	0.514058	0.0536727	0.377993	0.0507129	0.578215	0.0525404	0.540999	0.0532651	0.399795	0.0507117	0.375191	0.0527137	0.485702	0.0541011	0.421802	0.0511627
Inverse Plot	FALSE	0.397075	0.0497512	0.330306	0.0460695	0.343463	0.0476954	0.35675	0.0493239	0.370169	0.0509548	0.38372	0.0525884	0.397406	0.0542244	0.411226	0.055863	0.348868	0.0482664	0.351961	0.0485585	0.348868	0.0483519	0.411563	0.0557947			0.361172	0.0512487	0.4476	0.0521003	0.483309	0.0527925	0.510789	0.0537005	0.376052	0.0505751	0.575921	0.0524997	0.53766	0.0532269	0.397953	0.0505974	0.372132	0.0524889	0.482671	0.0539204	0.420123	0.0510654
Color Plot	TRUE	0.370704	0.0509388	0.330155	0.04606	0.343305	0.0476856	0.356585	0.0493137	0.369997	0.0509443	0.383541	0.0525775	0.397219	0.0542132	0.411033	0.0558514	0.351961	0.0486446	0.355061	0.0489361	0.351961	0.0487308	IsoLine	IsoLine			0.359621	0.0511305	0.445774	0.052019	0.480389	0.0527319	0.507274	0.0536984	0.374072	0.050396	0.573577	0.0524317	0.534247	0.0531515	0.396073	0.0504461	0.369012	0.0521964	0.479575	0.053686	0.418409	0.050936
3D plot	FALSE	0.481207	0.0526899	0.330037	0.0460468	0.343182	0.0476719	0.356457	0.0492995	0.369863	0.0509296	0.383401	0.0525623	0.397074	0.0541975	0.410882	0.0558353	0.355061	0.049023	0.358168	0.0493139	0.355061	0.0491099					0.358107	0.0509844	0.443989	0.0519124	0.477533	0.0526413	0.503608	0.0536664	0.372138	0.0501833	0.571285	0.0523396	0.53091	0.0530422	0.394237	0.0502644	0.365965	0.0518489	0.476551	0.0534079	0.416735	0.05078
Linear	FALSE	0.419317	0.0503283	0.329962	0.0460308	0.343104	0.0476554	0.356375	0.0492824	0.369778	0.050912	0.383313	0.052544	0.396982	0.0541787	0.410786	0.0558158	0.358168	0.0494015	0.361282	0.0496919	0.358168	0.0494891					0.356695	0.0508169	0.442323	0.0517851	0.474867	0.0525245	0.499893	0.0536056	0.370335	0.0499462	0.569145	0.0522272	0.527794	0.0529038	0.392525	0.0500602	0.363126	0.0514617	0.47373	0.0530986	0.415173	0.0506042
Data Range	N8:R29	0.429854	0.0500059	0.329936	0.0460135	0.343077	0.0476374	0.356347	0.0492638	0.369749	0.0508927	0.383283	0.0525242	0.39695	0.0541582	0.410753	0.0557947	0.361282	0.0497801	0.364403	0.0500699	0.361282	0.0498684					0.355447	0.0506353	0.440849	0.0516427	0.472506	0.0523867	0.496228	0.0535175	0.368743	0.0496952	0.56725	0.0520996	0.525035	0.0527424	0.391012	0.0498426	0.360617	0.0510516	0.471236	0.0527713	0.413793	0.0504164
Filled Symbols	FALSE	0.48702	0.0495214	0.329962	0.0459961	0.343104	0.0476194	0.356375	0.0492452	0.369778	0.0508735	0.383313	0.0525043	0.396982	0.0541377	0.410786	0.0557735	0.364403	0.0501589	0.367532	0.0504481	0.364403	0.0502478					0.354418	0.0504475	0.439631	0.0514913	0.470554	0.0522339	0.492714	0.0534045	0.367429	0.0494413	0.565684	0.0519622	0.522755	0.0525651	0.389764	0.049621	0.35855	0.0506365	0.469178	0.0524405	0.412654	0.0502247
ConcAge	FALSE	0.47412	0.0504913	0.330037	0.0459802	0.343182	0.0476028	0.356457	0.049228	0.369863	0.0508558	0.383401	0.052486	0.397074	0.0541188	0.410882	0.0557541	0.367532	0.0505378	0.370667	0.0508265	0.367532	0.0506274					0.353652	0.0502618	0.438723	0.0513377	0.469097	0.0520728	0.489448	0.0532697	0.366453	0.0491954	0.564515	0.0518211	0.521052	0.0523795	0.388835	0.049405	0.357013	0.0502347	0.467646	0.0521206	0.411806	0.0500376
ConcSwap	FALSE	0.47471	0.0503039	0.330155	0.0459669	0.343305	0.0475891	0.356585	0.0492138	0.369997	0.0508411	0.383541	0.0524708	0.397219	0.0541031	0.411033	0.055738	0.370667	0.0509168	0.37381	0.051205	0.370667	0.0510071					0.353184	0.0500862	0.438165	0.0511886	0.468198	0.0519105	0.486517	0.0531168	0.365857	0.0489685	0.563794	0.0516825	0.520001	0.0521938	0.388266	0.0492042	0.356075	0.0498637	0.466706	0.0518255	0.411286	0.0498631
1st Symbol-row	1	IsoLine	IsoLine	0.330306	0.0459574	0.343463	0.0475793	0.35675	0.0492037	0.370169	0.0508306	0.38372	0.05246	0.397406	0.0540919	0.411226	0.0557264	0.37381	0.051296	0.37696	0.0515836	0.37381	0.051387					0.353033	0.0499284	0.43798	0.0510504	0.467895	0.051754	0.484003	0.05295	0.365666	0.0487703	0.563553	0.0515524	0.519648	0.0520161	0.388083	0.0490273	0.355777	0.0495396	0.4664	0.0515683	0.411118	0.049709
				0.330479	0.0459525	0.343644	0.0475742	0.356939	0.0491984	0.370365	0.0508251	0.383925	0.0524543	0.397618	0.0540861	0.411448	0.0557204	0.37696	0.0516753	0.380117	0.0519623	0.37696	0.051767					0.353206	0.0497954	0.438176	0.0509291	0.468204	0.0516101	0.481973	0.0527738	0.365889	0.0486096	0.563801	0.0514365	0.520008	0.0518541	0.388292	0.048882	0.35613	0.0492767	0.466741	0.05136	0.411308	0.049582
				0.330659	0.0459525	0.343832	0.0475742	0.357135	0.0491984	0.37057	0.0508251	0.384138	0.0524543	0.39784	0.0540861	0.411678	0.0557204	0.380117	0.0520547	0.383281	0.0523412	0.380117	0.0521471					0.353696	0.0496929	0.438746	0.0508302	0.469109	0.0514852	0.480483	0.052593	0.366517	0.0484933	0.564529	0.0513399	0.521066	0.0517151	0.388886	0.0487748	0.357121	0.0490864	0.467715	0.0512099	0.411847	0.0494875
				0.330832	0.0459574	0.344012	0.0475793	0.357323	0.0492037	0.370766	0.0508306	0.384342	0.05246	0.398053	0.0540919	0.411899	0.0557264	0.383281	0.0524343	0.386453	0.0527203	0.383281	0.0525274					0.354481	0.0496254	0.439664	0.0507579	0.470572	0.0513848	0.479573	0.0524125	0.367521	0.0484266	0.565704	0.0512668	0.522776	0.0516049	0.389837	0.0487101	0.358705	0.0489771	0.469278	0.0511245	0.412714	0.0494299
				0.330983	0.0459669	0.34417	0.0475891	0.357488	0.0492138	0.370938	0.0508411	0.384522	0.0524708	0.398239	0.0541031	0.412093	0.055738	0.386453	0.052814	0.389632	0.0530994	0.386453	0.0529078					0.355527	0.0495959	0.44089	0.0507154	0.472528	0.0513131	0.479269	0.0522373	0.368859	0.0484124	0.567276	0.0512203	0.525062	0.0515285	0.391105	0.048691	0.360814	0.0489535	0.471362	0.0511074	0.413869	0.0494114
				0.331101	0.0459802	0.344294	0.0476028	0.357617	0.049228	0.371072	0.0508558	0.384661	0.052486	0.398385	0.0541188	0.412244	0.0557541	0.389632	0.0531939	0.392818	0.0534787	0.389632	0.0532883					0.356788	0.0496056	0.442371	0.0507045	0.474893	0.0512733	0.479579	0.0520722	0.37047	0.0484513	0.569174	0.0512026	0.527825	0.0514891	0.392633	0.0487182	0.363355	0.0490167	0.473877	0.0511596	0.415262	0.0494331
				0.331176	0.0459961	0.344372	0.0476194	0.357698	0.0492452	0.371157	0.0508735	0.38475	0.0525043	0.398477	0.0541377	0.41234	0.0557735	0.392818	0.0535739	0.396012	0.0538582	0.392818	0.053669					0.358209	0.0496542	0.444041	0.0507257	0.477562	0.0512673	0.480494	0.0519216	0.372286	0.0485416	0.571317	0.0512144	0.530944	0.0514886	0.394356	0.0487906	0.366217	0.0491639	0.476712	0.0512786	0.416832	0.0494939
				0.331201	0.0460135	0.344398	0.0476374	0.357726	0.0492638	0.371186	0.0508927	0.38478	0.0525242	0.398508	0.0541582	0.412373	0.0557947	0.396012	0.053954	0.399213	0.0542377	0.396012	0.0540499					0.359728	0.0497395	0.445829	0.0507781	0.480419	0.0512952	0.481989	0.0517897	0.374227	0.0486793	0.573611	0.0512551	0.534283	0.0515268	0.396197	0.0489049	0.369275	0.0493886	0.479744	0.0514593	0.418511	0.0495911
				ConcTikEll	ConcTikEll	ConcTikEll	ConcTikEll	ConcTikEll	ConcTikEll	ConcTikEll	ConcTikEll	ConcTikEll	ConcTikEll	ConcTikEll	ConcTikEll	ConcTikEll	ConcTikEll	0.399213	0.0543343	0.402421	0.0546175	0.399213	0.0544308					0.361278	0.0498577	0.447655	0.0508594	0.483339	0.0513558	0.484024	0.0516801	0.376208	0.0488584	0.575955	0.051323	0.537696	0.0516022	0.398077	0.0490563	0.372396	0.0496812	0.482839	0.0516938	0.420225	0.0497206
																		0.402421	0.0547147	0.405636	0.0549973	0.402421	0.0548119					0.362793	0.0500038	0.44944	0.050966	0.486195	0.0514465	0.486542	0.0515957	0.378142	0.0490712	0.578248	0.0514152	0.541033	0.0517115	0.399913	0.049238	0.375442	0.0500286	0.485863	0.0519718	0.421899	0.0498766
																		0.405636	0.0550952	0.408859	0.0553773	0.405636	0.0551931					0.364205	0.0501713	0.451105	0.0510934	0.488861	0.0515632	0.489476	0.0515388	0.379944	0.0493082	0.580388	0.0515276	0.544149	0.0518499	0.401625	0.0494421	0.378282	0.0504159	0.488684	0.0522812	0.423461	0.0500523
																		0.408859	0.0554759	0.412089	0.0557574	0.408859	0.0555745					0.365452	0.0503529	0.452579	0.0512358	0.491222	0.051701	0.492745	0.0515111	0.381537	0.0495592	0.582282	0.0516552	0.546908	0.0520113	0.403138	0.0496597	0.38079	0.050826	0.491178	0.0526084	0.424841	0.0502402
																		0.412089	0.0558567	0.415327	0.0561377	0.412089	0.055956					0.366482	0.0505407	0.453797	0.0513871	0.493174	0.0518538	0.496261	0.0515132	0.38285	0.0498132	0.583848	0.0517926	0.549188	0.0521886	0.404387	0.0498814	0.382858	0.051241	0.493236	0.0529392	0.42598	0.0504318
																		0.415327	0.0562377	0.418572	0.0565181	0.415327	0.0563377					0.367247	0.0507264	0.454705	0.0515407	0.494631	0.0520149	0.499926	0.0515451	0.383826	0.050059	0.585017	0.0519337	0.550891	0.0523742	0.405315	0.0500973	0.384394	0.0516429	0.494769	0.0532592	0.426828	0.050619
																		0.418572	0.0566188	0.421825	0.0568986	0.418572	0.0567195					0.367716	0.050902	0.455264	0.0516899	0.495531	0.0521772	0.503642	0.0516059	0.384423	0.050286	0.585738	0.0520723	0.551942	0.0525599	0.405884	0.0502981	0.385332	0.0520139	0.495708	0.0535542	0.427348	0.0507934
																		0.421825	0.057	0.422693	0.057	0.420961	0.057					0.367867	0.0510598	0.455449	0.0518281	0.495833	0.0523338	0.507307	0.0516941	0.384614	0.0504841	0.58598	0.0522024	0.552295	0.0527376	0.406067	0.050475	0.385631	0.052338	0.496014	0.0538114	0.427516	0.0509475
																		0.421825	0.057	ConcBand	ConcBand	ConcBand	ConcBand											0.51082	0.0518071
																		IsoLine	IsoLine															0.514087	0.0519418
																																		0.517017	0.0520947
																																		0.519532	0.0522615
																																		0.521562	0.0524378
																																		0.523052	0.0526186
																																		0.523961	0.052799
																																		0.524265	0.0529742
[truncated: 8 more columns]

## Sheet: PlotDat11
Source sheet	entregar - entregar	0.3	316.763	1	317.2	11.4192
Plot name	Average0	15.7	316.763	2	319.2	9.2568
Plot Type	15			3	321.9	10.3008
1st free col	8			4	324.1	14.5845
Sigma Level	2			5	310.8	15.2292
Absolute Errs	FALSE			6	317.3	8.5671
Symbol Type	1			7	321.2	11.242
Inverse Plot	FALSE			8	310.7	13.0494
Color Plot	TRUE			9	319.5	26.199
3D plot	FALSE			10	327.4	20.9536
Linear	FALSE			11	313.3	11.5921
Data Range	BO8:BP29			12	309.7	16.4141
Filled Symbols	FALSE			13	304.7	18.5867
ConcAge	FALSE			14	311.3	16.4989
ConcSwap	FALSE			15	311.4	17.7498
1st Symbol-row	1			IsoLine	IsoLine	IsoLine	IsoLine

## Sheet: PlotDat12
Source sheet	entregar - entregar	19.8043	0.0517729	21.7619	0.0521743	21.0201	0.0524034	20.3261	0.052634	19.6756	0.0528659	19.0644	0.0530994	18.4893	0.0533342	17.947	0.0535705	17.5	0.0536937	17.5	0.0535835	17.5	0.053804	22.5265	0.0518772	18.8283	0.09	20.1571	0.0520312	19.7183	0.0632366	19.5019	0.0674324	19.4059	0.0695821	20.6441	0.0552004	19.527	0.0806476	19.4179	0.0745709	20.5284	0.0582307	20.3974	0.0533576	19.5498	0.0667953	20.2315	0.060735
Plot name	Concordia0	19.4404	0.0629846	21.7607	0.0521996	21.0189	0.0524289	20.325	0.0526597	19.6745	0.0528919	19.0634	0.0531256	18.4883	0.0533607	17.946	0.0535973	17.5	0.0536937	17.5	0.0535835	17.5	0.053804	21.7328	0.0521045	20.2831	0.04	20.1428	0.0522554	19.7122	0.0634488	19.4956	0.067802	19.4005	0.0700576	20.6241	0.0554642	19.5215	0.0809271	19.4108	0.0749933	20.5111	0.0584883	20.3807	0.0536616	19.5373	0.0670842	20.2169	0.0609694
Plot Type	1	19.2146	0.0671512	21.7572	0.0522171	21.0156	0.0524467	20.3218	0.0526777	19.6714	0.0529101	19.0604	0.0531439	18.4853	0.0533792	17.9431	0.053616	17.625	0.053635	17.625	0.053525	17.625	0.053745	20.9919	0.0523333			20.1011	0.0524406	19.6942	0.0636408	19.4771	0.0681432	19.3844	0.0705091	20.5657	0.0556762	19.5053	0.0811816	19.3898	0.0753817	20.4604	0.0586971	20.3312	0.0539271	19.5004	0.067336	20.1741	0.0611598
1st free col	59	19.0093	0.069178	21.7518	0.0522256	21.0103	0.0524553	20.3167	0.0526864	19.6665	0.0529189	19.0556	0.0531529	18.4807	0.0533883	17.9386	0.0536252	17.7517	0.0535763	17.7517	0.0534666	17.7517	0.0536861	20.2989	0.0525635			20.0353	0.0525717	19.6652	0.063804	19.447	0.068441	19.3581	0.0709244	20.4736	0.0558191	19.4791	0.0814	19.3557	0.0757192	20.3806	0.0588401	20.2511	0.0541425	19.4408	0.0675399	20.1066	0.0612909
Sigma Level	1	20.1502	0.0548242	21.7449	0.0522242	21.0036	0.0524539	20.3102	0.0526851	19.6601	0.0529177	19.0495	0.0531517	18.4747	0.0533872	17.9329	0.0536242	17.8802	0.0535178	17.8802	0.0534082	17.8802	0.0536273	19.6492	0.0527951			19.9508	0.052638	19.6263	0.0639314	19.4068	0.0686825	19.3223	0.0712919	20.3554	0.0558815	19.444	0.0815726	19.3102	0.075991	20.278	0.0589057	20.144	0.0542984	19.3609	0.0676869	20.0199	0.0613519
Absolute Errs	TRUE	19.2762	0.0803548	21.7369	0.0522131	20.9959	0.0524429	20.3028	0.052674	19.6529	0.0529066	19.0425	0.0531406	18.468	0.0533761	17.9263	0.053613	18.0106	0.0534593	18.0106	0.05335	18.0106	0.0535686	19.0389	0.0530281			19.8545	0.0526343	19.5793	0.0640175	19.3582	0.068857	19.2779	0.0716019	20.2205	0.0558582	19.4016	0.0816921	19.2551	0.0761853	20.161	0.0588887	20.0144	0.054388	19.2644	0.0677705	19.9211	0.061338
Symbol Type	1	19.0924	0.0742166	21.7286	0.0521933	20.9879	0.0524229	20.295	0.0526539	19.6454	0.0528864	19.0352	0.0531203	18.4609	0.0533557	17.9194	0.0535925	18.1428	0.0534009	18.1428	0.0532919	18.1428	0.0535099	18.4644	0.0532626			19.7541	0.0525608	19.5263	0.0640584	19.3034	0.068957	19.2262	0.0718457	20.08	0.0557511	19.3537	0.0817531	19.193	0.0762935	20.0391	0.0587904	19.8681	0.0544073	19.1554	0.0677871	19.818	0.0612503
Inverse Plot	TRUE	20.1	0.0578853	21.7207	0.0521662	20.9802	0.0523957	20.2876	0.0526265	19.6382	0.0528588	19.0282	0.0530926	18.4541	0.0533278	17.9128	0.0535644	18.2769	0.0533426	18.2769	0.0532338	18.2769	0.0534514	17.9229	0.0534985			19.6577	0.0524235	19.4695	0.0640524	19.2446	0.068978	19.1686	0.0720167	19.9451	0.0555689	19.3024	0.081753	19.1264	0.076311	19.9221	0.0586187	19.7115	0.0543556	19.0386	0.067736	19.7192	0.0610958
Color Plot	TRUE	19.6314	0.0527809	21.7137	0.0521342	20.9735	0.0523634	20.2811	0.052594	19.6319	0.0528261	19.0221	0.0530596	18.4482	0.0532946	17.9071	0.053531	18.4129	0.0532844	18.4129	0.0531758	18.4129	0.0533929	IsoLine	IsoLine			19.5733	0.0522335	19.4114	0.0639997	19.1845	0.0689193	19.1067	0.0721103	19.8268	0.0553264	19.25	0.0816918	19.0584	0.0762369	19.8195	0.0583877	19.5513	0.054235	18.9193	0.0676193	19.6325	0.0608872
3D plot	FALSE	18.979	0.0662375	21.7083	0.0520997	20.9683	0.0523287	20.276	0.052559	19.627	0.0527908	19.0173	0.0530241	18.4436	0.0532588	17.9026	0.0534949	18.551	0.0532263	18.551	0.053118	18.551	0.0533346					19.5075	0.0520061	19.3546	0.0639026	19.1258	0.0687832	19.0421	0.0721239	19.7348	0.0550432	19.1987	0.0815722	18.9918	0.0760745	19.7397	0.0581159	19.3947	0.0540509	18.8026	0.0674423	19.565	0.0606412
Linear	FALSE	19.8695	0.0604267	21.7048	0.0520657	20.9649	0.0522943	20.2728	0.0525244	19.6239	0.0527559	19.0143	0.0529889	18.4406	0.0532233	17.8997	0.0534591	18.6911	0.0531682	18.6911	0.0530602	18.6911	0.0532763					19.4658	0.0517599	19.3015	0.0637654	19.0709	0.0685758	18.9766	0.0720572	19.6764	0.0547423	19.1508	0.0813994	18.9297	0.075831	19.689	0.0578254	19.2484	0.0538113	18.6936	0.0672127	19.5222	0.0603779
Data Range	N8:R29	19.9976	0.0623445	21.7037	0.0520348	20.9638	0.0522632	20.2717	0.052493	19.6228	0.0527242	19.0133	0.0529569	18.4396	0.053191	17.8987	0.0534266	18.8332	0.0531103	18.8332	0.0530025	18.8332	0.0532181					19.4515	0.0515147	19.2545	0.0635941	19.0223	0.0683062	18.912	0.0719119	19.6564	0.0544479	19.1084	0.0811809	18.8746	0.0755169	19.6716	0.0575398	19.1189	0.0535267	18.597	0.0669404	19.5076	0.0601185
Filled Symbols	FALSE	20.1933	0.0713267	21.7048	0.0520095	20.9649	0.0522376	20.2728	0.0524672	19.6239	0.0526982	19.0143	0.0529306	18.4406	0.0531645	17.8997	0.0533998	18.9775	0.0530524	18.9775	0.0529449	18.9775	0.05316					19.4658	0.0512905	19.2156	0.0633962	18.9821	0.067986	18.85	0.071692	19.6764	0.0541841	19.0733	0.0809263	18.8291	0.0751459	19.689	0.0572822	19.0117	0.0532094	18.5172	0.0666374	19.5222	0.0598841
ConcAge	FALSE	19.8054	0.0681036	21.7083	0.0519919	20.9683	0.0522199	20.276	0.0524493	19.627	0.0526801	19.0173	0.0529123	18.4436	0.053146	17.9026	0.0533811	19.1239	0.0529947	19.1239	0.0528873	19.1239	0.053102					19.5075	0.0511053	19.1866	0.0631802	18.952	0.0676294	18.7924	0.0714036	19.7348	0.0539721	19.0471	0.0806467	18.7951	0.0747344	19.7397	0.0570734	18.9316	0.0528735	18.4575	0.0663169	19.565	0.0596937
ConcSwap	TRUE	19.8792	0.0684425	21.7137	0.0519835	20.9735	0.0522113	20.2811	0.0524406	19.6319	0.0526712	19.0221	0.0529033	18.4482	0.0531369	17.9071	0.0533719	19.2726	0.052937	19.2726	0.0528299	19.2726	0.0530441					19.5733	0.0509742	19.1687	0.0629557	18.9335	0.0672519	18.7407	0.0710545	19.8268	0.0538292	19.0309	0.0803544	18.774	0.0743002	19.8195	0.0569304	18.8822	0.0525335	18.4207	0.065993	19.6325	0.0595626
1st Symbol-row	1	IsoLine	IsoLine	21.7207	0.0519849	20.9802	0.0522126	20.2876	0.0524418	19.6382	0.0526724	19.0282	0.0529045	18.4541	0.053138	17.9128	0.0533729	19.4235	0.0528794	19.4235	0.0527725	19.4235	0.0529863					19.6577	0.0509078	19.1626	0.0627325	18.9272	0.06687	18.6964	0.0706541	19.9451	0.0537668	19.0254	0.0800621	18.7669	0.0738623	19.9221	0.0568648	18.8654	0.0522043	18.4082	0.0656797	19.7192	0.0595016
				21.7286	0.0519959	20.9879	0.0522237	20.295	0.0524529	19.6454	0.0526836	19.0352	0.0529156	18.4609	0.0531492	17.9194	0.0533841	19.5768	0.0528219	19.5768	0.0527153	19.5768	0.0529285					19.7541	0.0509116	19.1687	0.0625203	18.9335	0.0665004	18.6605	0.0702135	20.08	0.0537901	19.0309	0.0797826	18.774	0.07344	20.0391	0.0568818	18.8822	0.0519003	18.4207	0.0653908	19.818	0.0595155
				21.7369	0.0520158	20.9959	0.0522437	20.3028	0.052473	19.6529	0.0527038	19.0425	0.0529359	18.468	0.0531695	17.9263	0.0534046	19.7324	0.0527645	19.7324	0.0526581	19.7324	0.0528709					19.8545	0.0509851	19.1866	0.0623284	18.952	0.0661592	18.6342	0.0697447	20.2205	0.0538972	19.0471	0.079528	18.7951	0.0730516	20.161	0.0569801	18.9316	0.0516348	18.4575	0.0651389	19.9211	0.0596032
				21.7449	0.0520428	21.0036	0.0522709	20.3102	0.0525004	19.6601	0.0527313	19.0495	0.0529637	18.4747	0.0531975	17.9329	0.0534327	19.8905	0.0527072	19.8905	0.052601	19.8905	0.0528133					19.9508	0.0511224	19.2156	0.0621651	18.9821	0.0658614	18.6182	0.0692604	20.3554	0.0540794	19.0733	0.0793097	18.8291	0.0727141	20.278	0.0571518	19.0117	0.0514194	18.5172	0.064935	20.0199	0.0597577
				21.7518	0.0520749	21.0103	0.0523032	20.3167	0.0525329	19.6665	0.0527641	19.0556	0.0529966	18.4807	0.0532307	17.9386	0.0534661	20.051	0.0526499	20.051	0.052544	20.051	0.0527558					20.0353	0.0513124	19.2545	0.0620377	19.0223	0.0656199	18.6127	0.0687739	20.4736	0.0543219	19.1084	0.079137	18.8746	0.0724422	20.3806	0.0573829	19.1189	0.0512635	18.597	0.0647881	20.1066	0.0599663
				21.7572	0.0521093	21.0156	0.0523379	20.3218	0.0525679	19.6714	0.0527993	19.0604	0.0530322	18.4853	0.0532664	17.9431	0.0535022	20.2141	0.0525928	20.2141	0.0524871	20.2141	0.0526985					20.1011	0.0515398	19.3015	0.0619516	19.0709	0.0654454	18.6182	0.0682983	20.5657	0.0546051	19.1508	0.0790175	18.9297	0.072248	20.4604	0.0576546	19.2484	0.0511739	18.6936	0.0647045	20.1741	0.0602123
				21.7607	0.0521434	21.0189	0.0523722	20.325	0.0526025	19.6745	0.0528342	19.0634	0.0530673	18.4883	0.0533019	17.946	0.053538	20.3799	0.0525357	20.3799	0.0524303	20.3799	0.0526412					20.1428	0.051786	19.3546	0.0619107	19.1258	0.0653454	18.6342	0.0678468	20.6241	0.0549061	19.1987	0.0789565	18.9918	0.0721397	20.5111	0.0579451	19.3947	0.0511546	18.8026	0.0646879	20.2169	0.0604756
				21.7619	0.0521743	21.0201	0.0524034	20.3261	0.052634	19.6756	0.0528659	19.0644	0.0530994	18.4893	0.0533342	17.947	0.0535705	20.5483	0.0524787	20.5483	0.0523735	20.5483	0.0525839					20.1571	0.0520312	19.4114	0.0619167	19.1845	0.0653244	18.6605	0.0674316	20.6441	0.0552004	19.25	0.0789566	19.0584	0.0721222	20.5284	0.0582307	19.5513	0.0512063	18.9193	0.064739	20.2315	0.060735
				ConcTikEll	ConcTikEll	ConcTikEll	ConcTikEll	ConcTikEll	ConcTikEll	ConcTikEll	ConcTikEll	ConcTikEll	ConcTikEll	ConcTikEll	ConcTikEll	ConcTikEll	ConcTikEll	20.7194	0.0524218	20.7194	0.0523169	20.7194	0.0525268							19.4695	0.0619694	19.2446	0.0653831	18.6964	0.067064			19.3024	0.0790178	19.1264	0.0721963			19.7115	0.0513268	19.0386	0.0648556
																		20.8933	0.052365	20.8933	0.0522603	20.8933	0.0524698							19.5263	0.0620665	19.3034	0.0655192	18.7407	0.0667541			19.3537	0.0791374	19.193	0.0723587			19.8681	0.0515109	19.1554	0.0650326
																		21.0701	0.0523083	21.0701	0.0522038	21.0701	0.0524128							19.5793	0.0622037	19.3582	0.0657266	18.7924	0.0665103			19.4016	0.0793102	19.2551	0.0726022			20.0144	0.0517506	19.2644	0.0652623
																		21.2499	0.0522517	21.2499	0.0521474	21.2499	0.052356							19.6263	0.062375	19.4068	0.0659962	18.85	0.0663392			19.444	0.0795287	19.3102	0.0729164			20.144	0.0520352	19.3609	0.0655346
																		21.4327	0.0521952	21.4327	0.0520911	21.4327	0.0522992							19.6652	0.0625729	19.447	0.0663164	18.912	0.0662456			19.4791	0.0797833	19.3557	0.0732873			20.2511	0.0523524	19.4408	0.0658376
																		21.6186	0.0521387	21.6186	0.0520349	21.6186	0.0522425							19.6942	0.0627889	19.4771	0.066673	18.9766	0.066232			19.5053	0.0800629	19.3898	0.0736989			20.3312	0.0526884	19.5004	0.0661581
																		21.8077	0.0520823	21.8077	0.0519788	21.8077	0.0521859							19.7122	0.0630134	19.4956	0.0670505	19.0421	0.0662988			19.5215	0.0803552	19.4108	0.0741331			20.3807	0.0530284	19.5373	0.066482
																		22	0.052026	22	0.0519227	22	0.0521294							19.7183	0.0632366	19.5019	0.0674324	19.1067	0.0664441			19.527	0.0806476	19.4179	0.0745709			20.3974	0.0533576	19.5498	0.0667953
																		22	0.052026	22	0.0519227	22	0.0521294											19.1686	0.0666639
																		IsoLine	IsoLine	ConcBand	ConcBand	ConcBand	ConcBand											19.2262	0.0669523
																																		19.2779	0.0673015
																																		19.3223	0.0677018
																																		19.3581	0.0681424
																																		19.3844	0.0686112
																																		19.4005	0.0690955
																																		19.4059	0.0695821
[truncated: 10 more columns]

## Sheet: U-Pb zircon geochronology
Table S3- U-Pb zircon geochronology: Alcáçovas quartzdioritic rock
SHRIMPTOOLS data processing; IBERSIMS laboratory, University of Granada, Spain
Errors are at one sigma level. The error in 206/238 averaging the standard has been already propagated. Th/U ratios are atomic (232/238), not in weight
Point-to point errors, calculated on replicates of the TEMORA standard, are: 0.13 % for 206Pb/238U, and 0.16% for 207Pb/206Pb
							common lead uncorrected													common lead uncorrected									208-corrected									208-corrected
				%	%		isotope ratios													ages (Ma)									isotope ratios									ages (Ma)
id	U (ppm)	Th (ppm)	206Pb (ppm)	f206_4	f206_8	Th/U	204Pb/206Pb	±err	207Pb/206Pb	±err	206Pb/238U	±err	207Pb/235U	±err	206Pb/238U	±err	rho	208Pb/232Th	±err	207Pb/206Pb	±err	206Pb/238U	±err	207Pb/235U	±err	% discord.	208Pb/232Th	±err	207Pb/206Pb	±err	206Pb/238U	±err	207Pb/235U	±err	206Pb/238U	±err	rho_8cor	207Pb/206Pb	±err	206Pb/238U	±err	207Pb/235U	±err	% discord.
SCV-8-18-1.1	427.157	164.849	18.6689	-0.244356	0.106267	0.395903	-0.00013456	5.765e-05	0.0517962	0.00035221	0.0504941	0.00059371	0.36045	0.00489588	0.0504941	0.00059371	0.623278	0.0161031	0.00022769	276.5	15.4	317.6	3.7	312.6	3.7	-1.6	322.9	4.6	0.050942	0.00107611	0.0504437	0.00059615	0.354151	0.00866694	0.0504437	0.00059615	0.347698	238.3	48	317.2	3.6	307.8	6.5	-3
SCV-8-18-10.1	1926.95	824.953	85.5297	8.05946	8.75914	0.439184	0.00443803	0.00017637	0.123492	0.00277338	0.0512809	0.00073584	0.87277	0.02326	0.0512809	0.00073584	0.38766	0.0360666	0.00101153	2007.3	39.4	322.4	4.5	637.1	12.7	49.4	716.1	19.8	0.0536375	0.00447774	0.0470857	0.00070786	0.348068	0.0295512	0.0470857	0.00070786	0.127491	355.9	178.2	296.6	4.4	303.3	22.5	2.2
SCV-8-18-11.1	783.768	289.973	34.8957	0.695128	1.38067	0.379542	0.00038278	1.066e-05	0.0630129	0.00055503	0.0514392	0.00048525	0.446714	0.00576545	0.0514392	0.00048525	0.526255	0.0198198	0.00037958	708.7	18.6	323.4	3	375	4.1	13.8	396.6	7.5	0.0518838	0.00153716	0.0507701	0.00048663	0.363033	0.01138	0.0507701	0.00048663	0.220153	280.3	66.4	319.2	2.9	314.5	8.5	-1.4
SCV-8-18-12.1	1364.41	365.278	61.4619	1.58084	1.69441	0.274641	0.00087051	3.009e-05	0.0671814	0.00110122	0.0520439	0.00051376	0.481864	0.00922032	0.0520439	0.00051376	0.371451	0.0227531	0.00066441	843.5	33.6	327.1	3.2	399.4	6.4	18.2	454.7	13.1	0.0532935	0.00205145	0.0511993	0.00051627	0.376049	0.0150251	0.0511993	0.00051627	0.181706	341.3	85	321.9	3.2	324.1	11.1	0.6
SCV-8-18-13.1	1431.31	503.133	65.1713	1.66479	2.10482	0.360611	0.00091674	0.00010705	0.0692091	0.0018131	0.0526058	0.00072441	0.501767	0.0148504	0.0526058	0.00072441	0.335002	0.0225634	0.00070599	904.9	53.2	330.5	4.4	412.9	10.1	20	450.9	13.9	0.0521875	0.00298795	0.0515596	0.00072485	0.370837	0.0219035	0.0515596	0.00072485	0.171373	293.7	125.6	324.1	4.5	320.3	16.4	-1.2
SCV-8-18-14.1	1782.23	765.558	76.5549	0.256494	0.501989	0.44066	0.00014124	1.136e-05	0.0548488	0.00022076	0.0496272	0.00080281	0.37514	0.00625359	0.0496272	0.00080281	0.698698	0.0166738	0.00031948	406.1	9	312.2	4.9	323.5	4.7	3.4	334.2	6.3	0.0508435	0.00155575	0.0493947	0.00080403	0.346116	0.0120608	0.0493947	0.00080403	0.336336	233.7	69.2	310.8	4.9	301.8	9.1	-3
SCV-8-18-15.1	1681.42	626.829	75.4998	3.19878	2.92232	0.382438	0.00176144	6.521e-05	0.080391	0.00077145	0.0518774	0.00044552	0.574766	0.00740177	0.0518774	0.00044552	0.480149	0.0240803	0.00039841	1206.7	18.6	326	2.7	461.1	4.8	29.2	480.9	7.9	0.0568482	0.00156222	0.0504496	0.00044102	0.395258	0.011487	0.0504496	0.00044102	0.216574	485.7	59.6	317.3	2.7	338.2	8.4	6.2
SCV-8-18-16.1	2018.06	610.008	91.4881	2.35172	2.57487	0.310092	0.001295	4.702e-05	0.07425	0.00123692	0.0523769	0.00058939	0.535972	0.0107748	0.0523769	0.00058939	0.403019	0.0250908	0.00054579	1048.3	33.2	329.1	3.6	435.8	7.2	24.4	500.8	10.7	0.0532634	0.00193786	0.0510923	0.00058214	0.375051	0.0143626	0.0510923	0.00058214	0.214219	340.1	80.2	321.2	3.5	323.4	10.7	0.6
SCV-8-18-17.1	861.746	206.13	26.5733	8.55532	10.4672	0.245386	0.00471108	6.336e-05	0.122614	0.00112011	0.0356267	0.00052887	0.602034	0.0104937	0.0356267	0.00052887	0.613193	0.041827	0.00082797	1994.7	16	225.7	3.3	478.5	6.6	52.8	828.1	16	0.0369301	0.00186152	0.0320226	0.00047946	0.162983	0.00859034	0.0320226	0.00047946	0.204533	0	0	203.2	3	153.3	7.5	-32.6
SCV-8-18-18.1	1158.82	228.757	49.9009	0.338627	0.759128	0.202511	0.00018647	3.335e-06	0.0579113	0.00029274	0.0497512	0.00069989	0.397075	0.00593561	0.0497512	0.00069989	0.677584	0.0193887	0.00030013	526.5	11	313	4.3	339.5	4.3	7.8	388.1	6	0.0516225	0.00064828	0.0493852	0.00069555	0.351351	0.0067499	0.0493852	0.00069555	0.527849	268.7	28.6	310.7	4.2	305.7	5	-1.6
SCV-8-18-19.1	485.246	232.316	21.3944	-0.00276786	0.260846	0.49114	-1.524e-06	1.406e-06	0.0528047	0.00034697	0.0509388	0.00131193	0.370704	0.00985329	0.0509388	0.00131193	0.697653	0.0164982	0.00092023	320.5	14.8	320.3	8.1	320.2	7.4	0	330.7	18.3	0.0507394	0.00503333	0.0508158	0.00134247	0.355345	0.0365012	0.0508158	0.00134247	0.185174	229.1	214.2	319.5	8.2	308.7	27.7	-3.4
SCV-8-18-2.1	5713.19	3323.03	278.447	0.593713	1.23572	0.596685	0.00032693	1.276e-05	0.0620087	0.00050935	0.0526899	0.00104599	0.481207	0.00977387	0.0526899	0.00104599	0.703718	0.0198701	0.00038933	674.5	17.4	331	6.4	398.9	6.7	17	397.6	7.7	0.052388	0.00225832	0.0520978	0.00104306	0.376146	0.0179296	0.0520978	0.00104306	0.302419	302.3	95.4	327.4	6.4	324.2	13.3	-1
SCV-8-18-20.1	1309.62	404.803	57.0491	0.776132	1.10008	0.317092	0.00042739	1.456e-05	0.0604539	0.00028352	0.0503283	0.0006052	0.419317	0.00541223	0.0503283	0.0006052	0.670791	0.0192638	0.00026062	619.9	10	316.5	3.7	355.6	3.9	11	385.6	5.1	0.0515011	0.00084608	0.0498014	0.0006007	0.353479	0.00731608	0.0498014	0.0006007	0.419599	263.3	37.4	313.3	3.7	307.3	5.5	-2
SCV-8-18-21.1	717.946	484.015	31.0744	1.17995	1.75792	0.691602	0.00064975	2.626e-05	0.0623726	0.00062637	0.0500059	0.00086335	0.429854	0.00858556	0.0500059	0.00086335	0.622375	0.0180708	0.00042745	686.9	21.4	314.6	5.3	363.1	6.1	13.4	362	8.5	0.048913	0.00307743	0.0492186	0.00086785	0.331787	0.0217121	0.0492186	0.00086785	0.194	143.7	141.4	309.7	5.3	290.9	16.7	-6.4
SCV-8-18-3.1	1830.9	602.649	78.4779	1.80735	2.38277	0.337667	0.00099523	0.00013727	0.0713588	0.0023501	0.0495214	0.00099689	0.48702	0.0187983	0.0495214	0.00099689	0.375504	0.0224755	0.00102064	967.7	65.8	311.6	6.1	402.9	12.9	22.6	449.2	20.2	0.052038	0.00398881	0.0484017	0.00099209	0.347126	0.0275712	0.0484017	0.00099209	0.185804	287.1	166.4	304.7	6.1	302.6	21	-0.6
SCV-8-18-4.1	2183.26	814.486	219.622	25.1614	50.5956	0.382708	0.0138554	0.00019994	0.452108	0.00484418	0.11622	0.00295034	7.24151	0.199535	0.11622	0.00295034	0.663335	0.339071	0.0124559	4092.1	16	708.8	17.1	2141.6	24.9	67	5900.9	188.9	0.0432006	0.0067419	0.0609791	0.0016726	0.363058	0.0575424	0.0609791	0.0016726	0.124604	0	192.3	381.6	10.2	314.5	43.8	-21.4
SCV-8-18-5.1	1036.29	327.425	43.1794	0.0621188	0.218835	0.324129	3.421e-05	4.351e-06	0.0530048	0.00037149	0.0481397	0.00073074	0.351662	0.00587956	0.0481397	0.00073074	0.653688	0.0157566	0.00063966	329.1	15.8	303.1	4.5	306	4.5	1	316	12.8	0.0512268	0.00244706	0.0480395	0.00074184	0.339158	0.0170707	0.0480395	0.00074184	0.220901	251.1	106.4	302.5	4.6	296.5	13	-2
SCV-8-18-6.1	1203.08	434.93	46.9385	5.19889	5.34632	0.370864	0.00286283	5.621e-05	0.0999408	0.00102529	0.045076	0.00099041	0.620861	0.0150553	0.045076	0.00099041	0.652391	0.0269964	0.00070153	1622.9	19	284.2	6.1	490.4	9.5	42	538.4	13.8	0.0568924	0.00225497	0.0427983	0.00094635	0.335573	0.0152784	0.0427983	0.00094635	0.349676	487.3	85.2	270.2	5.9	293.8	11.7	8
SCV-8-18-6.2	698.14	421.362	29.8078	0.550937	0.942867	0.619158	0.00030338	1.122e-05	0.0589909	0.00098898	0.0493283	0.00120829	0.401039	0.0119039	0.0493283	0.00120829	0.594161	0.0169031	0.00045115	566.7	36.2	310.4	7.4	342.4	8.7	9.4	338.8	9	0.0516849	0.00316211	0.0489067	0.00121043	0.348367	0.0230255	0.0489067	0.00121043	0.269608	271.5	134.6	307.8	7.4	303.5	17.5	-1.4
SCV-8-18-7.1	550.067	213.01	23.2492	3.577	4.75959	0.397259	0.00196971	0.00015314	0.0921349	0.00102374	0.0488319	0.00066028	0.62006	0.0108518	0.0488319	0.00066028	0.556276	0.0268325	0.00038159	1470.1	21	307.3	4	489.9	6.8	37.2	535.1	7.5	0.0539264	0.00145502	0.0466463	0.00063349	0.346676	0.0105463	0.0466463	0.00063349	0.321428	367.9	59.8	293.9	3.9	302.2	8	2.8
SCV-8-18-8.1	1515.46	497.433	66.2294	1.06506	2.10973	0.336729	0.00058649	3.754e-05	0.0681342	0.00267086	0.0504913	0.00085198	0.47412	0.0202342	0.0504913	0.00085198	0.284673	0.0221185	0.00105401	872.7	79.2	317.5	5.2	394	14	19.4	442.1	20.8	0.0510193	0.00437195	0.0494806	0.00085958	0.347917	0.0304461	0.0494806	0.00085958	0.142932	241.7	186.4	311.3	5.3	303.2	23.2	-2.6
SCV-8-18-9.1	2805.41	2512.39	122.899	1.77445	1.87945	0.918713	0.00097712	1.02e-05	0.068055	0.00066012	0.0503039	0.00092502	0.47471	0.00982216	0.0503039	0.00092502	0.63989	0.0177448	0.00035644	870.3	20	316.4	5.7	394.4	6.7	19.8	355.5	7.1	0.0542111	0.00345065	0.0494894	0.00093161	0.369748	0.0245791	0.0494894	0.00093161	0.203889	379.9	137	311.4	5.7	319.5	18.4	2.6
